# Supplementary material
Source: PubMed Central journal article supplement (PMC4558692)
Supplement: supp_tpc.114.135699_tpc135699_Supplemental.pdf [file supp_tpc.114.135699_tpc135699_Supplemental.pdf]

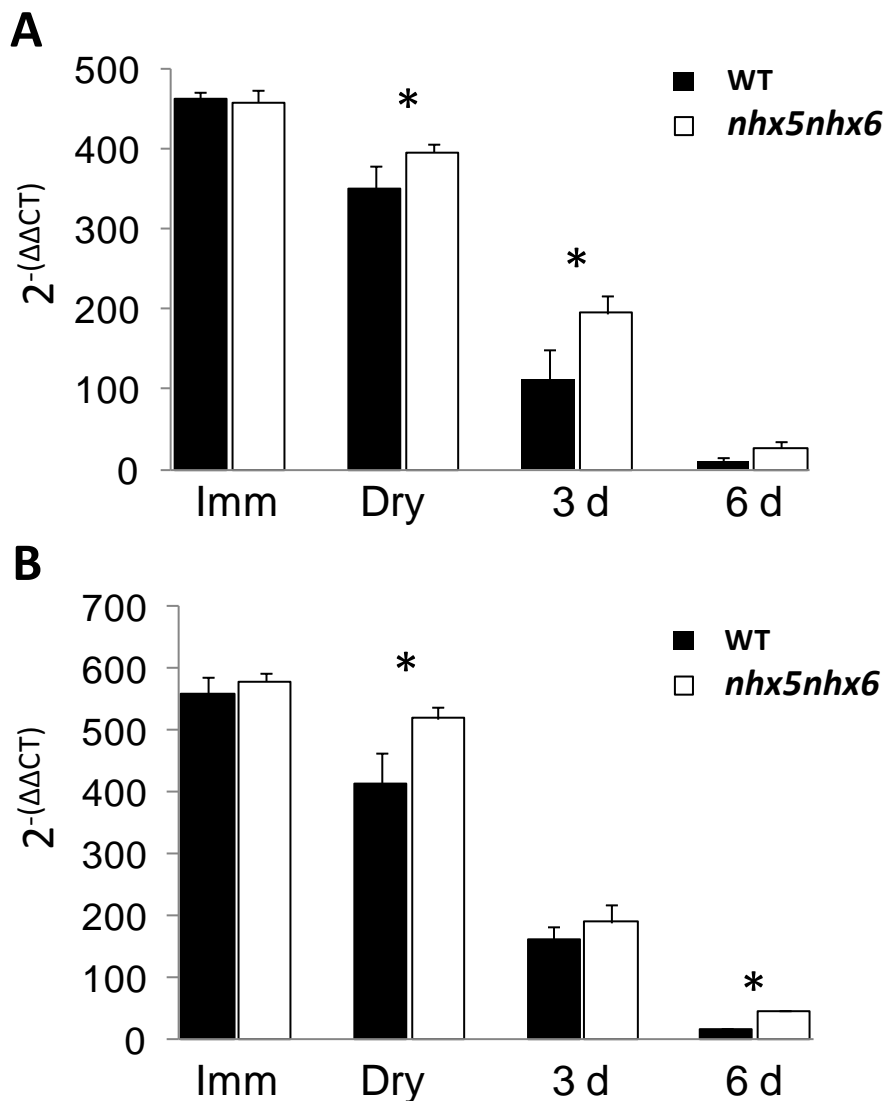

**Supplemental Figure 1. Quantitative Real-Time RT-PCR of relative expression of two storage protein transcripts.**

**(A)** Relative expression ( $2^{-(\Delta\Delta CT)}$ ) of 12S *CRA1* (At5G44120); and **(B)** 2S (*S1*, *S2*, *S3*) transcripts of samples taken at four different developmental stages, Immature seeds (Imm); Dry seeds (Dry); 3 days (3d) and 6 days (6d) after germination. Asterisk indicates  $P \leq 0.05$ . Bars represent the mean  $\pm$  s.d. (n=6). The primers used amplify all 2S1, 2S2, and 2S3 transcripts (see Supplemental Table 3).

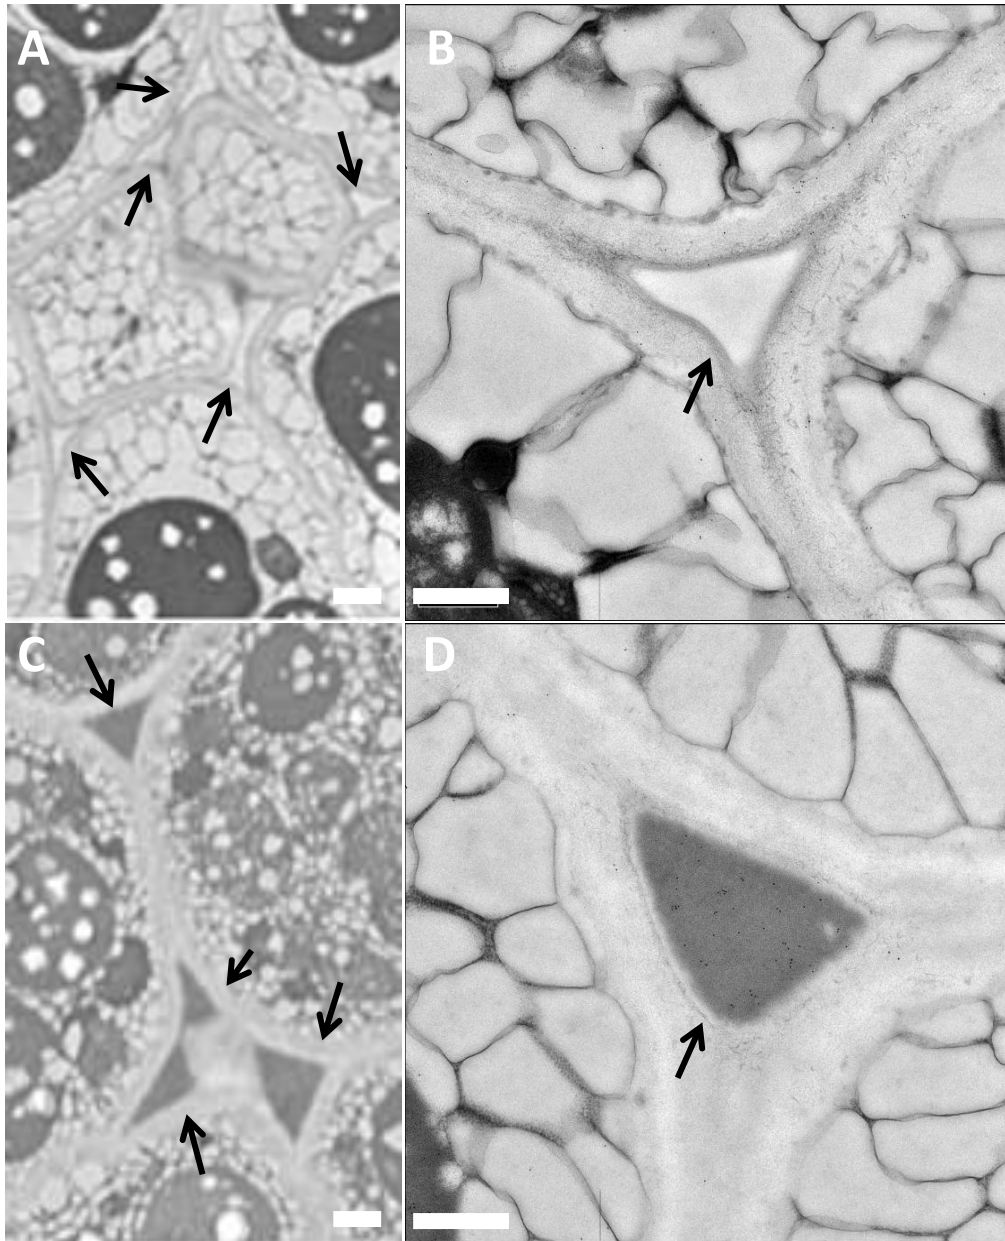

**Supplemental Figure 2. Transmission electron micrographs of dry seed thin sections.**

**(A, B)** Wild type

**(C, D)** *nhx5 nhx6*. **(B), (D)** are an enlargement of **(A)**, and **(C)** respectively.

Note the enlargement of the apoplastic space in *nhx5 nhx6* and where an accumulation of electron dense material also exists (arrows). Bar is 0.025  $\mu\text{m}$  in **(A)** and **(C)** and 0.5  $\mu\text{m}$  in **(B)** and **(D)**.

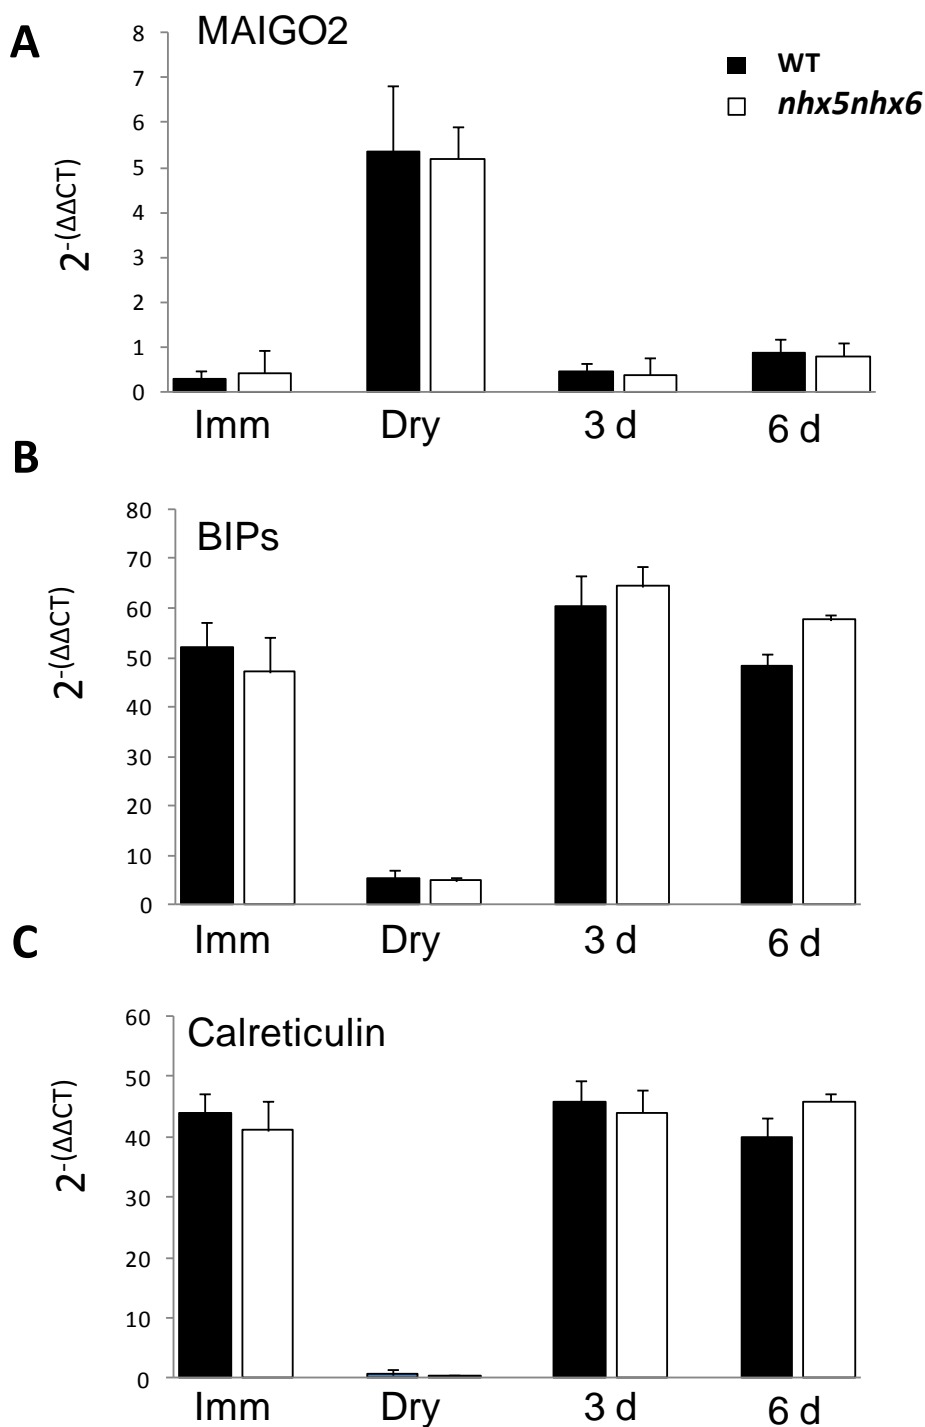

**Supplementary Figure 3. Quantitative Real-Time RT-PCR of the relative expression of three genes related to the unfolded protein response (UPR-genes) in seeds and seedlings at different developmental stages.**

Relative expression ( $2^{-(\Delta\Delta CT)}$ ) of **(A)** *MAIGO2* (At3g47700), **(B)** *BIPs* (*BIP1* (At5g20730), *BIP2* (At5g42020) and *BIP3* (At1g09080)) or **(C)** *calreticulin* (At1g56340) was not significantly different between wild type and *nhx5 nhx6* at any developmental stage. Error bars represent the mean  $\pm$  s.d. n=4.

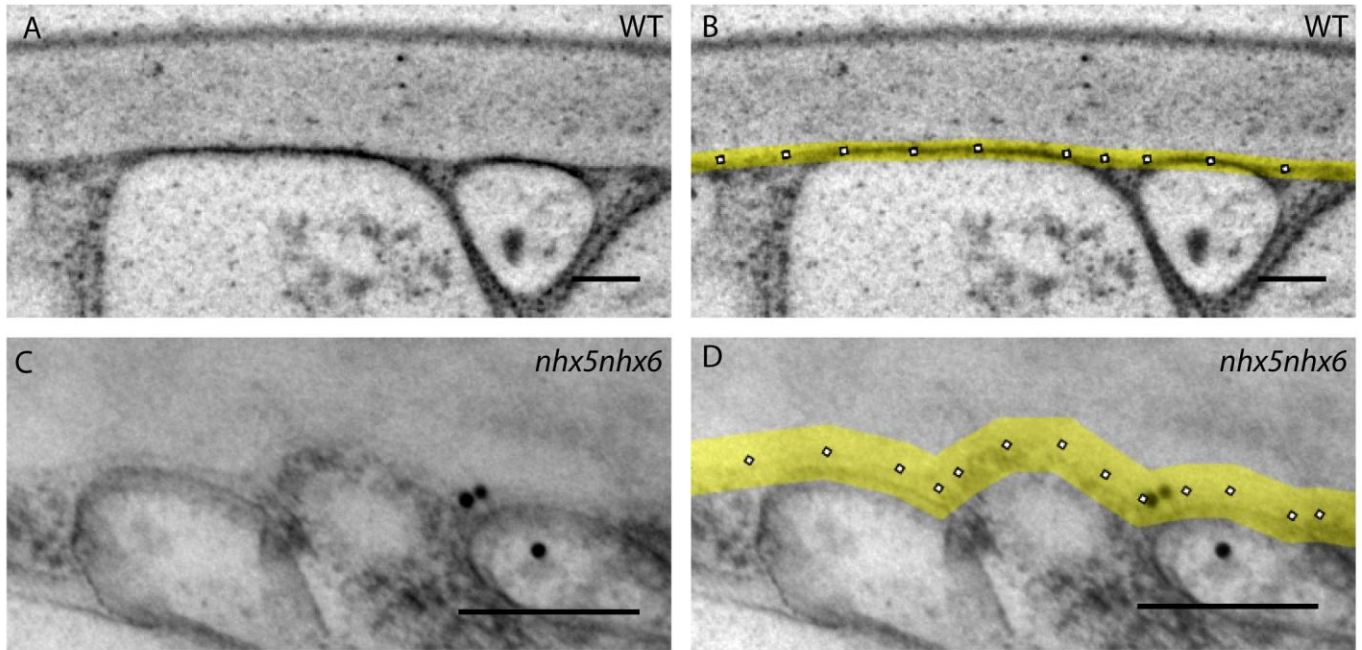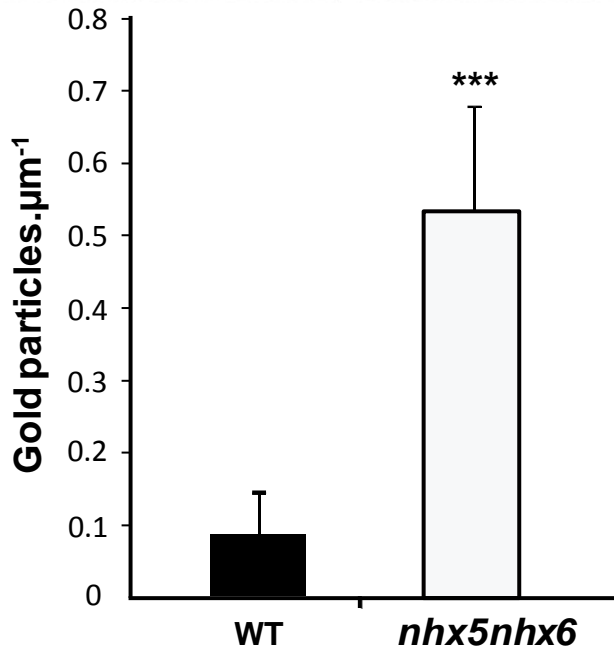

**Supplemental Figure 4. Quantification of gold particles in high-pressure frozen-freeze substituted embryos labeled with anti-VSR antibody.**

A region of interest spanning 30nm to each side of the plasma membrane (yellow ROI **B,D**) was delineated in order to quantify the number of gold particles contained within the ROI, in WT (**A,B**) (n=67.3µm of plasma membrane in 20 sections) and *nhx5 nhx6* (**C,D**) (n=25.3µm of plasma membrane in 9 sections). \*\*\*  $P \leq 0.01$ . Scale bar= 200nm.

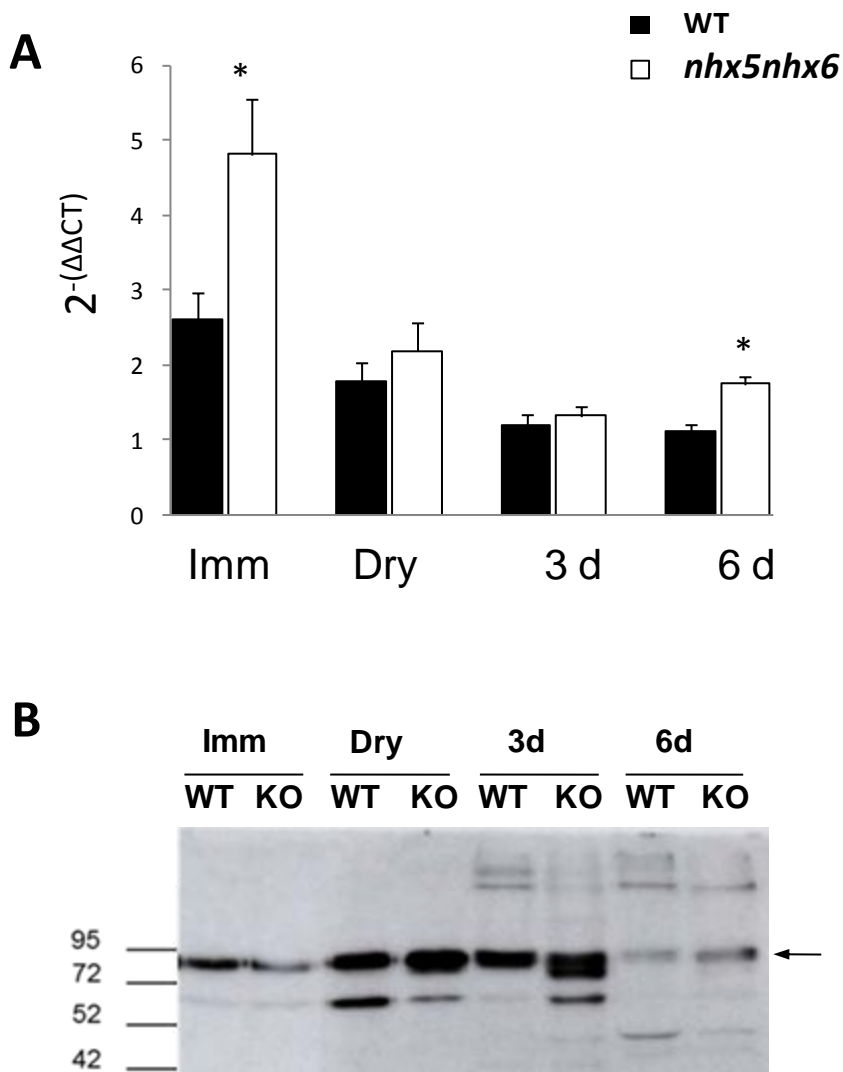

**Supplemental Figure 5. Quantitative Real-Time RT-PCR of relative expression and immunoblot of protein abundance of VSR1 in developing seeds and germinating seedlings of *nhx5 nhx6*.**

**(A)** Quantitative Real-Time RT-PCR showing relative expression ( $2^{-(\Delta\Delta CT)}$ ) of *VSR1* transcripts; **(B)** and immunodetection of VSR1;1 at different stages of seed and seedling development in wild type (WT) and *nhx5 nhx6* (KO). Immature seeds (Imm); mature seeds (Dry); 3 days and 6 days after germination (3d) and (6d), respectively. Arrow points to predicted MW (~85kD) of VSR1. Bars represent the mean  $\pm$  s.d.  $n=4$ . Asterisk indicates  $P \leq 0.05$ .

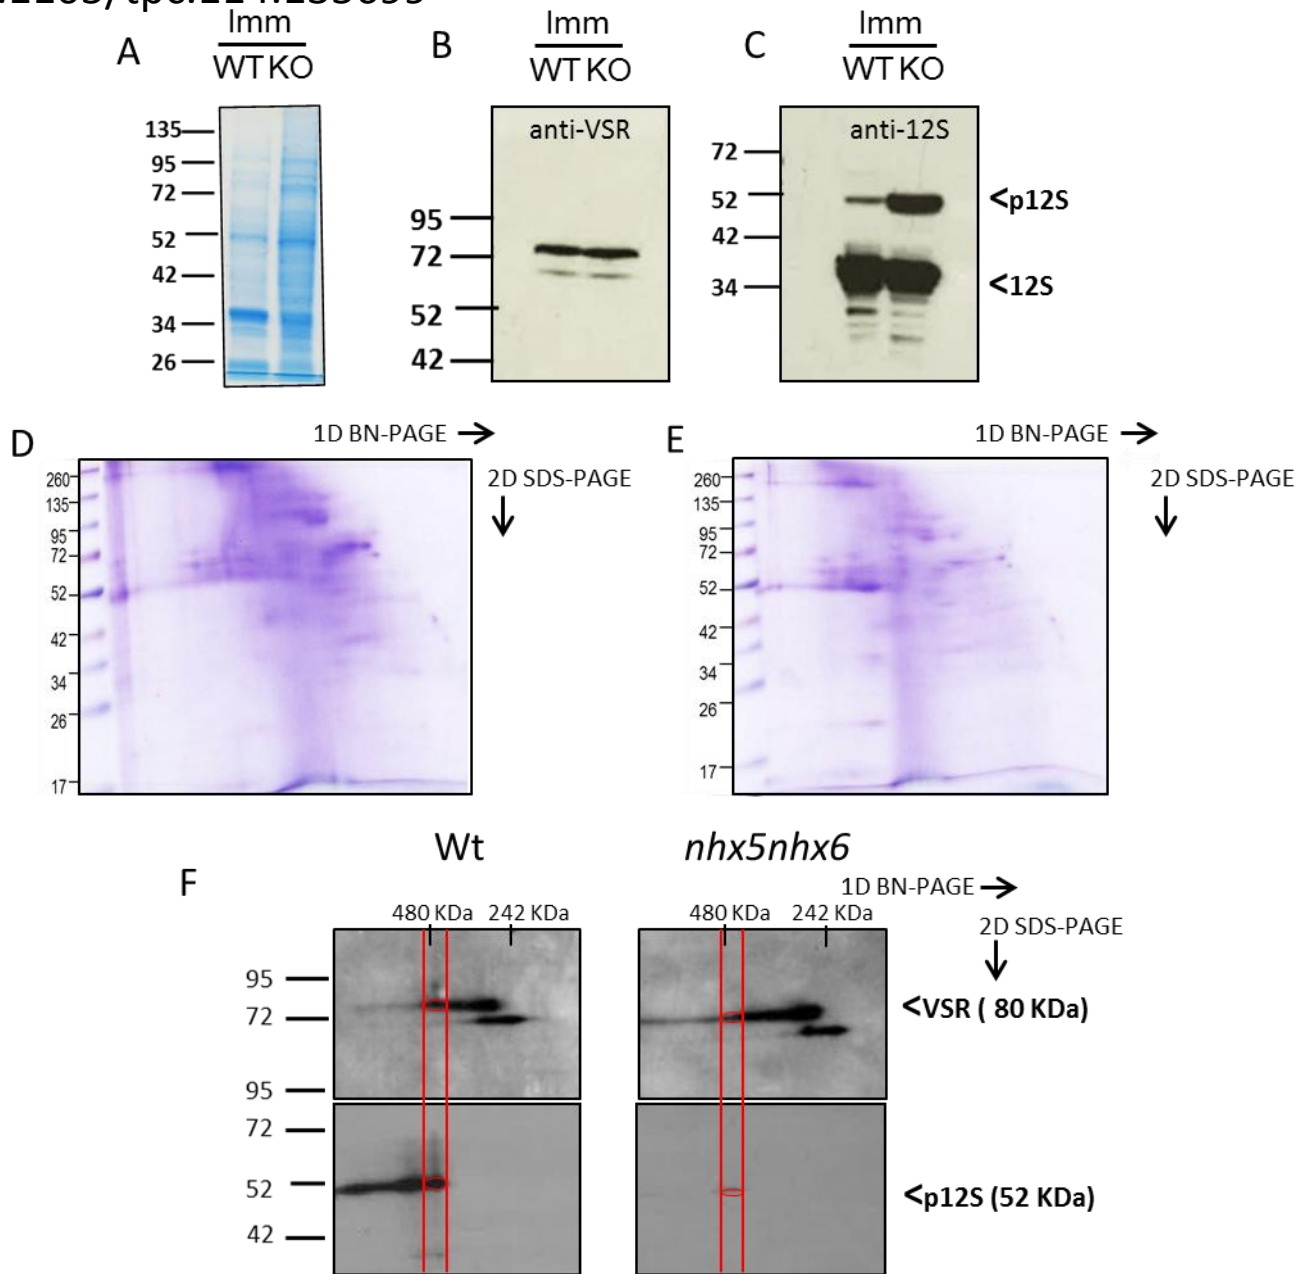

**Supplemental Figure 6. Protein loading controls for the identification of receptor-cargo complexes resolved using 2D blue native PAGE/SDS.**

(A) Coomassie stained 1D SDS-PAGE (10% acrylamide) gel of wild type (WT) and *nhx5 nhx6* immature (Imm) seed protein extracts (15  $\mu$ g of total protein were loaded per lane). Immunoblots using  $\alpha$ -VSR (B) and  $\alpha$ -12S (C). 2D blue native PAGE/SDS gels stained with Coomassie of wild type (D) and *nhx5 nhx6* (E) extracts (45  $\mu$ g of total protein were loaded). (F) Illustration of the method used to delineate the signals used for the quantification of VSR1;1 and 12S spots in complexes shown in Figure 5. Signals bound between two vertical red lines and highlighted within the red ovals were considered as the total VSR1;1 or 12S signal (area and intensity) as explained in Results and Methods. Apparent size of the denatured proteins are 80 kDa for VSR1;1 in (B) and 52 kDa and 34 kDa for p12S and 12S, respectively in (C).

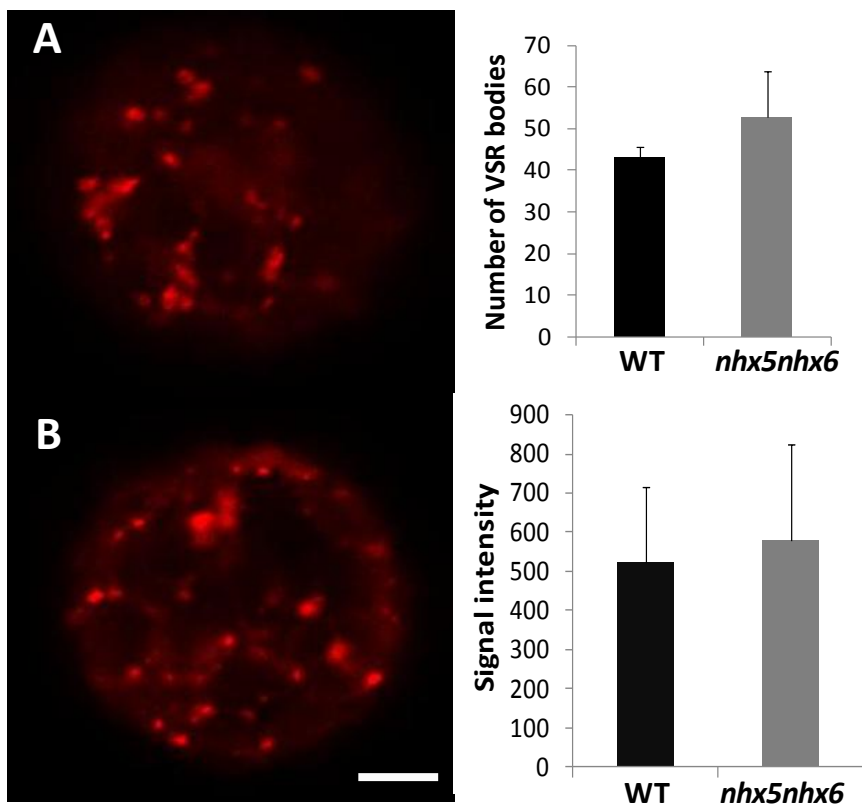

**Supplemental Figure 7. Expression of VSR1;1-mRFP in isolated protoplasts.**

Wild type (A) and *nhx5 nhx6* (B) protoplasts. Bars are  $\pm$  S.D. and \* designates  $P \leq 0.05$ . Scale bar is 5  $\mu$ m.

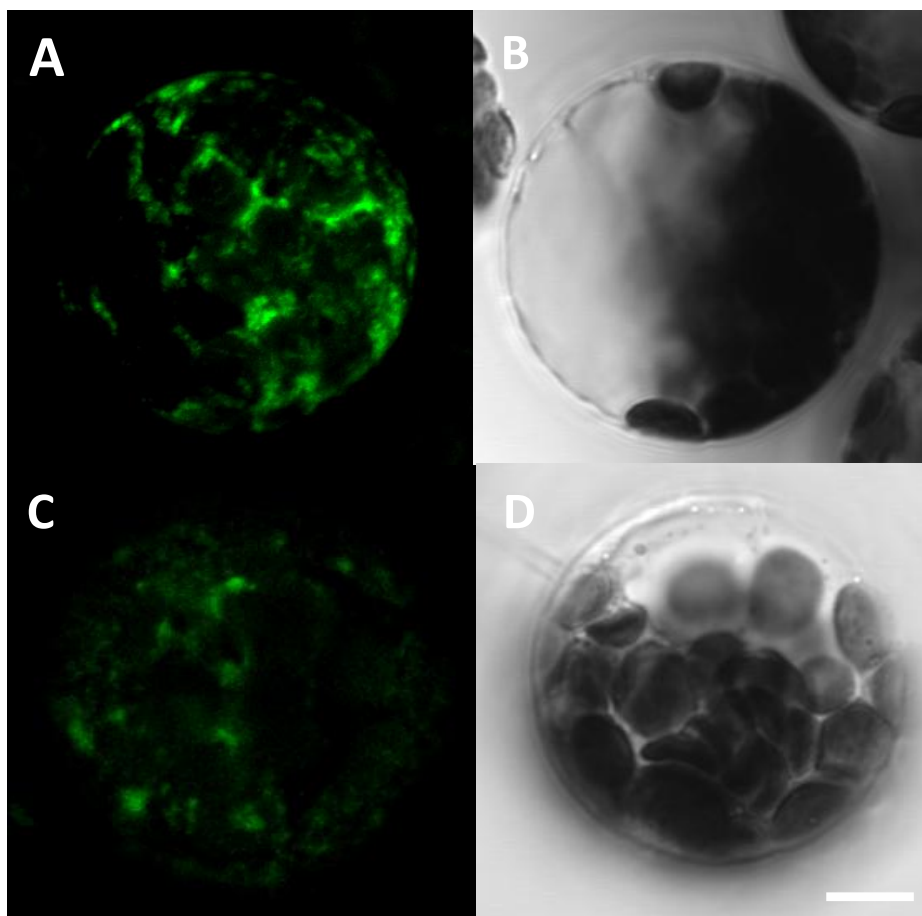

**Supplemental Figure 8. *In vivo* interaction between 12S globulin and VSR2;1 is also compromised in *nhx5 nhx6*.**

Interaction is visualized as bimolecular fluorescence complementation (BiFC) between p12S globulin fused at the C-terminus to the N-terminal half of Venus (12S-VYNE) and co-transformed with a construct expressing the C-terminal half of super cyan fluorescent protein (SCYCE) fused to the N-terminus of VSR2;1 (SCYCE-VSR2;1) in isolated mesophyll protoplasts. Images are 3D projections of a series of 7 z-stack images of (A) wild type and (C) *nhx5 nhx6*. (B) and (D) are the corresponding DIC light images of wild type and *nhx5 nhx6* respectively. Scale bar is 5  $\mu\text{m}$ .



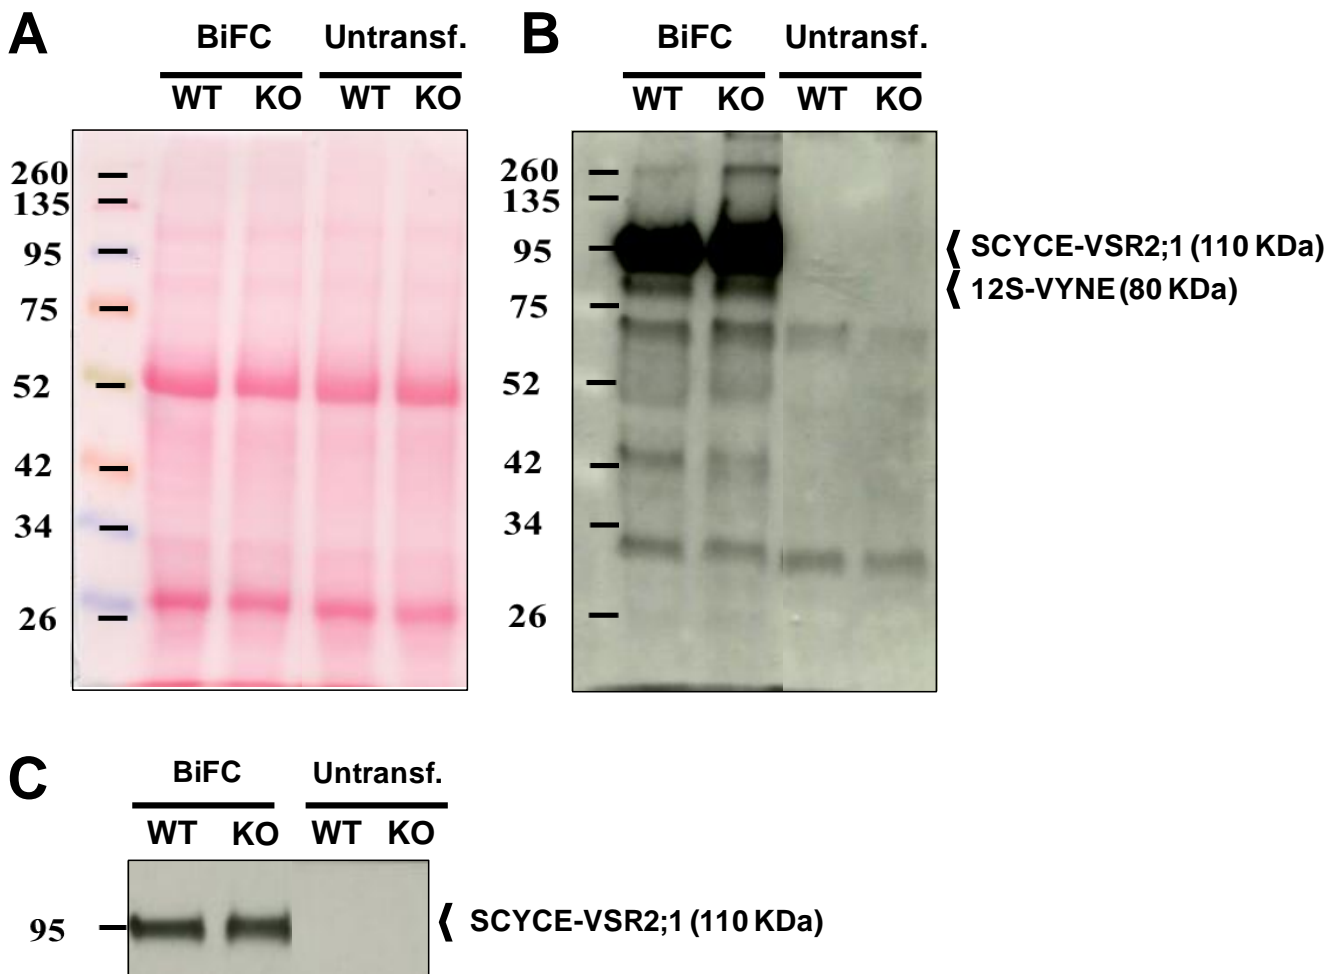

**Supplemental Figure 9. Abundance of VSR2;1 and 12S used in the bimolecular fluorescence complementation assay in isolated mesophyll protoplasts.**

SCYCE-VSR2;1 is the C-terminal half of super cyan fluorescent protein (SCYCE) fused to the N-terminus of VSR2;1. 12S-VYNE is the globulin 12S carrying the N-terminal half of Venus at its C-terminus. Both were cotransformed into protoplasts as described for Figure 8. Anti-GFP 1:1000 (Novus Biologicals, Littleton, CO) was used to immunodetect 12S-VYNE and SCYCE-VSR2;1 to determine their expression in WT and *nhx5nhx6* (KO) protoplasts.

**(A)** Ponceau S staining indicating the protein loading control of protoplast protein extracts transformed with 12S-VYNE and SCYCE-VSR2;1 (BiFC) and untransformed protoplasts (Untransf.). Wild type (WT) and *nhx5 nhx6* (KO) were loaded in alternate lanes. **(B)** Immunoblot of protein extracts (from [A]) probed using  $\alpha$ -GFP to determine the protein abundance of both interaction partners in transformed mesophyll protoplasts. **(C)** Same as [B] but with reduced film exposure to indicate the unsaturated SCYCE-VSR2;1 signal. 20  $\mu$ g of total protein were loaded per lane.

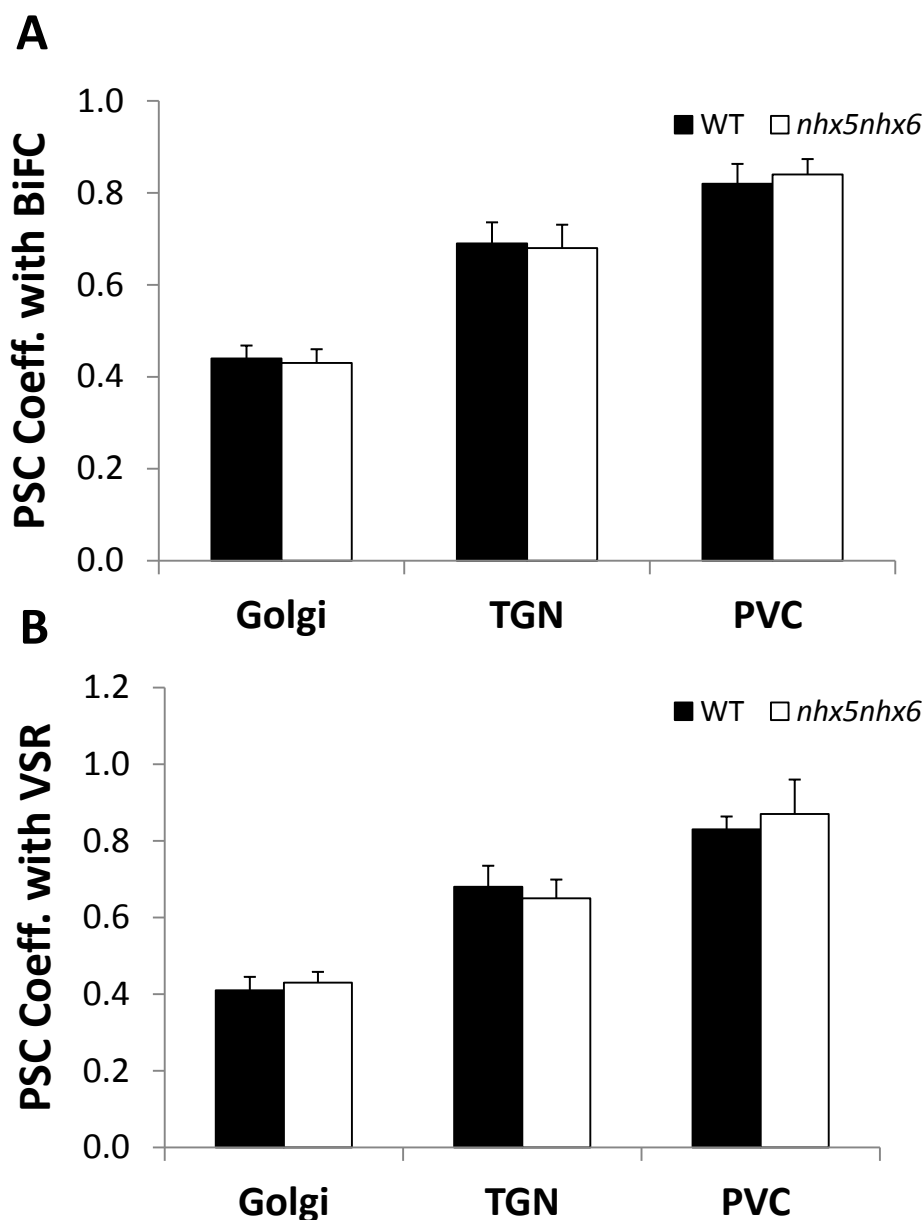

**Supplemental Figure 10. Colocalization in bimolecular fluorescence complementation experiments.**

**(A)** Colocalization with bimolecular complementation bodies (BiFC) and with **(B)** VSR2;1 with Golgi, TGN and PVC markers in isolated mesophyll protoplasts. BiFC bodies resulted from the coexpression of Aleu-VYNE (aleurain fused at the C-terminus to the N-terminal half of Venus) with SCYCE-VSR2;1 (C-terminal half of Super Cyan fluorescent Protein fused to the N-terminus of VSR2;1) as described for Figure 8. For VSR, VSR2;1-GFP was used.

The subcellular markers were: (49aa) GmMan1 –RFP (Saint-Jore-Dupas et al., 2006) for the Golgi; Syp61-RFP (Foresti and Denecke, 2008) for the TGN and ARA7-mRFP for the PVC (Geldner et al. 2009). PSC is the Pearson's Correlation Coefficient obtained using the Coloc2 plugin of FiJi as described in Methods. Given the reduced BiFC in *nhx5 nhx6*, colocalization with each marker was assessed only where BiFC bodies existed. Error bars are s.d.  $\pm$  20-33 protoplasts.  $P \leq 0.05$

**Supplemental Table 1. Constructs used for bimolecular fluorescence complementation experiments**

| Constructs                | Primers                                                                   | Template                                                                             | Plasmid backbone                     | Cloning methods                  |
|---------------------------|---------------------------------------------------------------------------|--------------------------------------------------------------------------------------|--------------------------------------|----------------------------------|
| <b>pENTR-Aleu</b>         | B1-Aleu, B2-Aleu140aa                                                     | cDNA of Arabidopsis Col0                                                             | pDONR207 (Invitrogen)                | BP reaction                      |
| <b>Aleu-VYNE</b>          | N/A                                                                       | N/A                                                                                  | pDEST-GWVYNE (Gehl et al., 2009)     | LR reaction with pENTR-Aleu      |
| <b>pENTR-12S</b>          | B1-12S, B2 12S                                                            | cDNA of Arabidopsis Col0                                                             | pDONR207 (Invitrogen)                | BP reaction                      |
| <b>12S-VYNE</b>           | N/A                                                                       | N/A                                                                                  | pDEST-GWSCYNE (Gehl et al., 2009)    | pENTR-12S                        |
| <b>SCYCE-VSR2;1</b>       | Xba-SP-SCYCEf, Spe-SCYCEr                                                 | pDEST-SCYCE(R) <sup>GW</sup> (Gehl et al., 2009)                                     | pH-VSR (Martinière et al., 2013)     | XbaI/SpeI digestion and ligation |
| <b>pENTR-Chimera</b>      | B1-GFP and VYNEr for VYNE fragment. SCYCEf and B2-GFP for SCYCE fragment. | pDEST-VYNE(R) <sup>GW</sup> (Gehl et al., 2009)<br>pDEST-GWSCYNE (Gehl et al., 2009) | pDONR207 (Invitrogen)                | BP reaction                      |
| <b>VYNE-SCYCE chimera</b> | N/A                                                                       | N/A                                                                                  | pEarleyGate100 (Earley et al., 2007) | LR reaction with pENTR-chimera   |
| <b>Aleu-mRFP</b>          | N/A                                                                       | N/A                                                                                  | pH7RWG2,0 (Karimi et al., 2007)      | LR reaction with pENTR-Aleu      |

**Supplemental Table 2. List of primers used to generate constructs used for bimolecular fluorescence complementation experiments**

| Primer name          | Sequences                                                                                                                    |
|----------------------|------------------------------------------------------------------------------------------------------------------------------|
| <b>B1-Aleu</b>       | <u>GGGGACAAGTTTGTACAAAAAAGCAGGCTTAATGTCTGCGAAAACAATC</u>                                                                     |
| <b>B2-Aleu140aa</b>  | <u>GGGGACCACTTTGTACAAGAAAGCTGGGTAAGCTGCTTCGTGACCTT</u>                                                                       |
| <b>Xba-SP-VYNEf</b>  | ac <u>TCTAGA</u> AATGAAGCAGCTTCTATGTTATCTTCCATGGCTTCTTCTCTCTCTTGTGGTTTCCCC<br>TTTTAACGAGGCTGCAGgaGTGgtgagcaagggcgaggagctg    |
| <b>Spe-VYNEr</b>     | gg <u>ACTAGT</u> ccaggcctgggccaagatcctc                                                                                      |
| <b>Xba-SP-SCYCEf</b> | ac <u>TCTAGA</u> AATGAAGCAGCTTCTATGTTATCTTCCATGGCTTCTTCTCTCTCTTGTGGTTTCCCC<br>TTTTAACGAGGCTGCAGgaGTGgacaagcagaagaacggcatcaag |
| <b>Spe-SCYCEr</b>    | gg <u>ACTAGT</u> ccaggcctgggccaagatcctc                                                                                      |
| <b>B1-GFP</b>        | <u>GGGGACAAGTTTGTACAAAAAAGCAGGCT</u> Tatggtgagcaagggcgaggagctgttc                                                            |
| <b>B2-GFP</b>        | <u>GGGGACCACTTTGTACAAGAAAGCTGGG</u> Tctactgtacagctcgtccatgccgag                                                              |
| <b>SCYCEf</b>        | atcaccgccgacaagcagaagaacggcatcaag                                                                                            |
| <b>VYNEr</b>         | ctgatgccgttcttctgcttgcggcggat                                                                                                |
| <b>B1-12S</b>        | <u>GGGGACAAGTTTGTACAAAAAAGCAGGCTGGATGGCTCGAGTCTCTTCTCT</u>                                                                   |
| <b>B2-12S</b>        | <u>GGGGACCACTTTGTACAAGAAAGCTGGGTGAGCTGCAGCCACCCTTGGC</u>                                                                     |

**Supplemental Table 3. List of primers used for quantitative real time PCR**

| <b>Gene(s)</b>                  | <b>Identifier</b>                   | <b>Primer sequence</b>                                   |
|---------------------------------|-------------------------------------|----------------------------------------------------------|
| 12S                             | At5G44120                           | F CCCCATCCTTCGCTTCATC<br>R CCATTGCGTTTTGACGGATA          |
| 2S family                       | At4G27140<br>At4G27150<br>At4G27160 | F CTCCTCACCAACGCTTCCAT<br>R TGGCGTCATCTTCTTCGAACT        |
| VSR1;1                          | At3G52850                           | F GTGGTCACCATATGGATAT<br>R TACATGGAAACTTAAAGCTACT        |
| BIPs                            | At5G28540<br>At5G42020<br>At1G09080 | F CAAGGACGCTGTTGTCACTGTT<br>R TCCTTGGTAGCTTGCCTTTGA      |
| Calreticulin-1                  | At1G56340                           | F GAAACACACAGCTGGAAATTGG<br>R AATCTGTAGTCCTCGCTAGTTTGGA  |
| MAIGO 2                         | At3G47700                           | F TGATCTCTCTTCTTCTACCTCCGTTAC<br>R GATCCTCTCCGGCTACATGCT |
| TIP4;1 like<br>(reference gene) | At4G34270                           | F GTGAAAAGCTGTTGGAGAGAAGCAA<br>R TCAACTGGATACCCTTTTCGCA  |
